# Supplementary material for: Cross sectional study on behavioral determinants associated with sugary foods and beverages and its corelates with body mass index among adolescents
Source: bioRxiv or medRxiv preprint supplement (doi:10.1101/2024.03.24.24304815), 2024-03-26
Supplement: Supplementary file [file media-1.pdf]

## SUPPLEMENTARY FILE I: QUESTIONNAIRE (ENGLISH)

| S.N                                                                                       | Questions                                                                                                    | Responses                                                                                                                                                | Skip pattern                                                    |
|-------------------------------------------------------------------------------------------|--------------------------------------------------------------------------------------------------------------|----------------------------------------------------------------------------------------------------------------------------------------------------------|-----------------------------------------------------------------|
| <b>SECTION A- SOCIO DEMOGRAPHIC CHARACTERISTICS</b>                                       |                                                                                                              |                                                                                                                                                          |                                                                 |
| 1.                                                                                        | Age (in years)                                                                                               |                                                                                                                                                          |                                                                 |
| 2.                                                                                        | Sex                                                                                                          | a. Male<br>b. Female                                                                                                                                     | c. Others                                                       |
| 3.                                                                                        | Ethnicity                                                                                                    | a. Brahmin/ Chhetri<br>b. Janajati<br>c. Madhesi                                                                                                         | d. Muslim<br>e. Dalit<br>f. Others                              |
| 4.                                                                                        | Religion                                                                                                     | a. Hindu                                                                                                                                                 | b. Other than Hindu                                             |
| 5.                                                                                        | Monthly income of family                                                                                     | Rs.                                                                                                                                                      |                                                                 |
| 6.                                                                                        | Who do you live with?                                                                                        | a. With parents<br>b. In hostel<br>c. With relatives<br>d. Others .....                                                                                  |                                                                 |
| <b>SECTION B- PARENTAL CHARACTERISTICS</b>                                                |                                                                                                              |                                                                                                                                                          |                                                                 |
| 7.                                                                                        | Educational status of mother                                                                                 | a. Illiterate<br>b. Literate<br>c. Lower secondary level (6-8)                                                                                           | d. Secondary level (9-12)<br>e. Bachelors and above             |
| 8.                                                                                        | Occupation of mother                                                                                         | a. Agriculture<br>b. Labor<br>c. Job service<br>d. Business/Shop                                                                                         | e. Homemaker<br>f. Foreign employment<br>g. Others.....<br>.... |
| 9.                                                                                        | Educational status of father                                                                                 | a. Illiterate<br>b. Literate<br>c. Lower secondary level (6-8)                                                                                           | d. Secondary level (9-12)<br>e. Bachelors and above             |
| 10.                                                                                       | Occupation of father                                                                                         | a. Agriculture<br>b. Labor<br>c. Job service<br>d. Business/Shop                                                                                         | e. Homemaker<br>f. Foreign employment<br>g. Others.....<br>.... |
| <b>SECTION C- PERSONAL AND BEHAVIORAL CHARACTERISTICS</b>                                 |                                                                                                              |                                                                                                                                                          |                                                                 |
| 11.                                                                                       | Weight (to be taken by researcher)                                                                           |                                                                                                                                                          | (in kg)                                                         |
| 12.                                                                                       | Height (to be taken by researcher)                                                                           |                                                                                                                                                          | (in cm)                                                         |
| <b>SECTION D- KNOWLEDGE REGARDING SUGARY FOODS AND BEVERAGES AND ITS IMPACT ON HEALTH</b> |                                                                                                              |                                                                                                                                                          |                                                                 |
| 13.                                                                                       | What is the meaning of sugary foods and drinks?                                                              | a. Foods and drinks with high amount of energies (calories)<br>b. Foods and drinks with adequate essential nutrients<br>c. None of them<br>d. Don't know |                                                                 |
| 14.                                                                                       | Are the sugary foods and beverages harmful for your health?                                                  | a. Yes they are harmful<br>b. No they are not harmful<br>c. Don't know                                                                                   |                                                                 |
|                                                                                           | <b>What's your view on questions mentioned below?</b>                                                        | <b>(True)</b>                                                                                                                                            | <b>(False)</b>                                                  |
| 15.                                                                                       | Foods and drinks with excess amount of sugar increases our weight and causes obesity.                        |                                                                                                                                                          |                                                                 |
| 16.                                                                                       | Foods and drinks with excess amount of sugar do not cause dental caries.                                     |                                                                                                                                                          |                                                                 |
| 17.                                                                                       | Foods and drinks with excess amount of sugar causes stomach pain and bloating.                               |                                                                                                                                                          |                                                                 |
| 18.                                                                                       | Foods and drinks with excess amount of sugar causes various nutritional deficiencies.                        |                                                                                                                                                          |                                                                 |
| 19.                                                                                       | Foods and drinks with excess amount of sugar increases the risk of causing high blood pressure and diabetes. |                                                                                                                                                          |                                                                 |

|                                                                 |                                                                                                          |                                                                                                                                                    |                                                                                                                       |                 |
|-----------------------------------------------------------------|----------------------------------------------------------------------------------------------------------|----------------------------------------------------------------------------------------------------------------------------------------------------|-----------------------------------------------------------------------------------------------------------------------|-----------------|
| 20                                                              | Foods and drinks with excess amount of sugar may cause stones in kidney.                                 |                                                                                                                                                    |                                                                                                                       |                 |
| 21.                                                             | Foods and drinks with excess amount of sugar do not cause any heart related diseases.                    |                                                                                                                                                    |                                                                                                                       |                 |
| <b>SECTION E- ATTITUDE TOWARDS SUGARY FOODS AND BEVERAGES</b>   |                                                                                                          |                                                                                                                                                    |                                                                                                                       |                 |
|                                                                 | <b>Statements</b>                                                                                        | <b>Categories</b>                                                                                                                                  |                                                                                                                       |                 |
|                                                                 |                                                                                                          | <b>Agree</b>                                                                                                                                       | <b>Neutral</b>                                                                                                        | <b>Diasgree</b> |
| 22.                                                             | Sugary foods and drinks contain high amount of sugar content.                                            |                                                                                                                                                    |                                                                                                                       |                 |
| 23.                                                             | Sugary foods and drinks contain harmful coloring agents to give artificial colour to them.               |                                                                                                                                                    |                                                                                                                       |                 |
| 24.                                                             | Sugary foods and drinks contain various sweetening agents to enhance their taste.                        |                                                                                                                                                    |                                                                                                                       |                 |
| 25.                                                             | Sugary foods and drinks are very fresh foods.                                                            |                                                                                                                                                    |                                                                                                                       |                 |
| 26.                                                             | Sugary foods and drinks causes rapid weight gain.                                                        |                                                                                                                                                    |                                                                                                                       |                 |
| 27.                                                             | I feel that I should control sugary food and drinks consumption habit and decreases the intake of those. |                                                                                                                                                    |                                                                                                                       |                 |
| 28.                                                             | I will be healthy and free from diseases if I controlled the intake of sugary foods and drinks           |                                                                                                                                                    |                                                                                                                       |                 |
| 29.                                                             | Excessive intake of sugary foods and drinks can increase my weight rapidly and make me overweight.       |                                                                                                                                                    |                                                                                                                       |                 |
| 30.                                                             | My parents tell me not to eat or eat very less sugary foods and drinks.                                  |                                                                                                                                                    |                                                                                                                       |                 |
| 31.                                                             | I can save my lots of money if I control myself from eating such sugary foods and drinks.                |                                                                                                                                                    |                                                                                                                       |                 |
| 32.                                                             | I may be addicted to sugary foods and drinks if I didn't control my habit now.                           |                                                                                                                                                    |                                                                                                                       |                 |
| 33.                                                             | I like the taste and enjoy eating sugary foods and sugary beverages.                                     |                                                                                                                                                    |                                                                                                                       |                 |
| 34.                                                             | But if asked, I can also stop eating and drinking such foods and drinks completely.                      |                                                                                                                                                    |                                                                                                                       |                 |
| <b>SECTION F- PRACTICE REGARDING SUGARY FOODS AND BEVERAGES</b> |                                                                                                          |                                                                                                                                                    |                                                                                                                       |                 |
| 35.                                                             | Do you consume sugary foods and beverages?                                                               | a. Yes<br>b. No                                                                                                                                    |                                                                                                                       |                 |
| 36.                                                             | What are the sugary foods and drinks you consumed in the last week ?                                     |                                                                                                                                                    |                                                                                                                       |                 |
| 37.                                                             | What is the main source of information for sugary foods and drinks for you?                              | a. Social media<br>b. Advertisments<br>c. Friends<br>d. Siblings                                                                                   | e. Parents<br>f. Observation in stores<br>g. Others .....                                                             |                 |
| 38.                                                             | Do you prefer sugary foods and beverages over usual meals as an alternative to regular meals?            | a. Yes, I prefer<br>b. No, I don't prefer                                                                                                          |                                                                                                                       |                 |
| 39.                                                             | What are the major reasons for consumption of sugary foods and beverages?                                | a. Felt bored of home foods<br>b. Curiosity to try new foods<br>c. Favorite leisure time activity<br>d. Friends influence<br>e. Siblings influence | f. Advertisement influence<br>g. Quick to eat and finish<br>h. Affordable price<br>i. Good taste<br>j. (Others) ..... |                 |
| 40.                                                             | What is the most usual time to consume sugary foods and beverages?                                       | a. Before school as breakfast<br>b. At school during lunch                                                                                         | c. After school<br>d. Whenever available                                                                              |                 |

Gautam L, Thapa M et al. (2023)
