# Supplementary material for: Cross sectional study on behavioral determinants associated with sugary foods and beverages and its corelates with body mass index among adolescents
Source: bioRxiv or medRxiv preprint supplement (doi:10.1101/2024.03.24.24304815), 2024-03-26
Supplement: Supplementary file [file media-2.pdf]

## SUPPLEMENTARY FILE 2: TABLES AND FIGURE

**Table A.** Knowledge on sugary foods and beverages and their harmful effects

| <b>Indicator category</b>                                            | <b>Frequency</b> | <b>Percentage</b> |
|----------------------------------------------------------------------|------------------|-------------------|
| Level of knowledge                                                   |                  |                   |
| Adequate knowledge                                                   | 646              | 84.1              |
| Inadequate knowledge                                                 | 122              | 15.9              |
| Meaning of sugary items                                              |                  |                   |
| Contains high calories                                               | 359              | 46.7              |
| Full of good nutrients                                               | 53               | 6.9               |
| None of them                                                         | 114              | 14.9              |
| Don't know                                                           | 253              | 32.9              |
| Harmfulness of the items                                             |                  |                   |
| Harmful                                                              | 625              | 81.4              |
| Not harmful                                                          | 39               | 5.1               |
| Don't know                                                           | 104              | 13.5              |
| Awareness of ill effects associated with consumption of sugary items |                  |                   |
| Weight gain & obesity                                                | 655              | 87.2              |
| Dental caries                                                        | 688              | 89.6              |
| Digestive issues                                                     | 562              | 74.8              |
| Nutritional deficiency                                               | 520              | 69.2              |
| High BP and diabetes                                                 | 657              | 87.5              |
| Risk of kidney stones                                                | 341              | 45.4              |
| Heart related disease                                                | 172              | 77.1              |

**Table B.** Attitude towards sugary foods and beverages

| <b>Indicator category</b>                    | <b>Frequency</b> | <b>Percentage</b> |
|----------------------------------------------|------------------|-------------------|
| Level of attitude                            |                  |                   |
| Positive attitude                            | 461              | 60.0              |
| Negative attitude                            | 307              | 40.0              |
| Perceived intake habit                       |                  |                   |
| Likes the taste and enjoys eating such foods | 449              | 58.5              |
| Neutral regarding the statement              | 179              | 23.3              |
| Disagrees on enjoying eating such foods      | 140              | 18.2              |
| Parents pressure against consumption         |                  |                   |
| Agree                                        | 602              | 78.4              |
| Neutral                                      | 121              | 15.8              |
| Disagree                                     | 45               | 5.9               |

**Table C.** Practice of sugary foods and beverages among respondents

| <b>Indicator category</b>                              | <b>Frequency</b> | <b>Percentage</b> |
|--------------------------------------------------------|------------------|-------------------|
| Consumption of sugary foods and beverages              |                  |                   |
| Yes                                                    | 649              | 84.5              |
| No                                                     | 119              | 15.5              |
| Types of sugary foods and beverages consumed (*n=1222) |                  |                   |
| Processed sweet foods                                  | 132              | 20.4              |
| Confectionary/ Bakery                                  | 444              | 68.5              |
| Desert sweets                                          | 137              | 21.1              |
| Sweet hot beverages                                    | 79               | 12.2              |
| Cold beverages                                         | 430              | 66.4              |
| Source of information (*n=804)                         |                  |                   |
| Social media                                           | 182              | 29.0              |
| Advertisements                                         | 175              | 27.9              |
| Friends                                                | 124              | 19.8              |
| Siblings                                               | 44               | 7.0               |
| Parents                                                | 92               | 14.7              |
| Observation in stores                                  | 187              | 29.8              |
| Preference as an alternative over usual meals (n=649)  |                  |                   |
| Yes                                                    | 180              | 27.7              |
| No                                                     | 469              | 72.3              |
| Usual time for consumption (n=649)                     |                  |                   |
| As early breakfast                                     | 39               | 6.0               |
| At school during lunch                                 | 117              | 18.0              |
| After school                                           | 230              | 35.5              |
| Whenever available                                     | 263              | 40.5              |

**Table D.** Knowledge, Attitude and Practice of sugary foods and beverages among respondents

| <b>Behavioral determinants</b> | <b>Frequency</b> | <b>Percentage</b> |
|--------------------------------|------------------|-------------------|
| Knowledge                      |                  |                   |
| Adequate                       | 646              | 84.1              |
| Inadequate                     | 122              | 15.9              |
| Attitude                       |                  |                   |
| Positive attitude              | 461              | 60.0              |
| Negative attitude              | 307              | 40.0              |
| Practice (Consumption)         |                  |                   |
| Yes                            | 649              | 84.5              |
| No                             | 119              | 15.5              |

**Table E:** Bivariate analysis of knowledge level and socio-demographic variables

| Demographic Characteristics   | Level of knowledge  |                   | $\chi^2$ | p-value      |
|-------------------------------|---------------------|-------------------|----------|--------------|
|                               | Inadequate<br>n (%) | Adequate<br>n (%) |          |              |
| Type of school                |                     |                   |          |              |
| Public                        | 55 (21.7)           | 199 (78.3)        | 9.45     | <0.01*       |
| Private                       | 67 (13.0)           | 447 (87.0)        |          |              |
| Grade of study                |                     |                   |          |              |
| Eight                         | 48 (18.8)           | 207 (81.2)        | 2.46     | 0.29         |
| Nine                          | 37 (14.5)           | 218 (85.5)        |          |              |
| Ten                           | 37 (14.3)           | 221 (85.7)        |          |              |
| Age (in years)                |                     |                   |          |              |
| ≤ 14                          | 49 (13.4)           | 316 (86.6)        | 3.15     | 0.07         |
| > 14                          | 73 (18.1)           | 330 (81.9)        |          |              |
| Sex of the participant        |                     |                   |          |              |
| Male                          | 60 (15.2)           | 335 (84.8)        | 0.29     | 0.58         |
| Female                        | 62 (16.6)           | 311 (83.4)        |          |              |
| Ethnicity                     |                     |                   |          |              |
| Brahmin/Chhetri               | 51 (15.0)           | 290 (85.0)        | 0.58     | 0.74         |
| Janajati                      | 65 (16.9)           | 320 (83.1)        |          |              |
| Others                        | 6 (14.3)            | 36 (85.7)         |          |              |
| Religion                      |                     |                   |          |              |
| Hindu                         | 97 (16.7)           | 485 (83.3)        | 1.09     | 0.29         |
| Others                        | 25 (13.4)           | 161 (86.6)        |          |              |
| Monthly income of family      |                     |                   |          |              |
| <15,000 NPR                   | 20 (27.0)           | 54 (73.0)         | 9.95     | <b>0.04*</b> |
| 15,001-30,000 NPR             | 45 (17.4)           | 214 (82.6)        |          |              |
| 30,001-45,000 NPR             | 23 (13.8)           | 144 (86.2)        |          |              |
| 45,001-60,000 NPR             | 19 (13.1)           | 126 (86.9)        |          |              |
| >60,001 NPR                   | 15 (12.2)           | 108 (87.8)        |          |              |
| Living status of participants |                     |                   |          |              |
| With parents                  | 104 (14.9)          | 596 (85.1)        | 6.25     | <b>0.01*</b> |
| Others                        | 18 (26.5)           | 50 (73.5)         |          |              |
| <b>Parental demographics</b>  |                     |                   |          |              |
| Educational status of mother  |                     |                   |          |              |
| Illiterate                    | 26 (21.1)           | 97 (78.9)         | 3.29     | <0.01*       |
| Literate                      | 21 (18.9)           | 90 (81.1)         |          |              |
| Primary level                 | 38 (20.2)           | 150 (79.8)        |          |              |
| Secondary level               | 30 (11.4)           | 234 (88.6)        |          |              |
| Bachelors and above           | 7 (8.5)             | 75 (91.5)         |          |              |
| Mother's occupation           |                     |                   |          |              |
| Job service                   | 22 (17.3)           | 105 (82.7)        | 1.93     | 0.58         |
| Business/Shop                 | 22 (15.7)           | 118 (84.3)        |          |              |
| Homemaker                     | 46 (14.0)           | 282 (86.0)        |          |              |
| Others                        | 32 (18.5)           | 141 (81.5)        |          |              |
| Educational status of father  |                     |                   |          |              |
| Illiterate                    | 9 (14.3)            | 54 (85.7)         | 8.61     | 0.07         |
| Literate                      | 18 (21.4)           | 66 (78.6)         |          |              |
| Primary level                 | 34 (20.1)           | 135 (79.9)        |          |              |

|                     |           |            |      |              |
|---------------------|-----------|------------|------|--------------|
| Secondary level     | 48 (15.2) | 267 (84.8) |      |              |
| Bachelors and above | 13 (9.5)  | 124 (90.5) |      |              |
| Father's occupation |           |            |      |              |
| Job service         | 38 (15.0) | 215 (85.0) |      |              |
| Business/Shop       | 31 (14.2) | 187 (85.8) | 8.04 | <b>0.04*</b> |
| Foreign employment  | 15 (11.6) | 114 (88.4) |      |              |
| Others              | 38 (22.6) | 130 (77.4) |      |              |

\*p value <0.05

**Table F:** Bivariate analysis of attitude and socio-demographic variables

| Demographic Characteristics   | Level of attitude |                | $\chi^2$ | p-value          |
|-------------------------------|-------------------|----------------|----------|------------------|
|                               | Negative n (%)    | Positive n (%) |          |                  |
| Type of school                |                   |                |          |                  |
| Public                        | 103 (40.6)        | 151 (59.4)     | 0.05     | 0.81             |
| Private                       | 204 (39.7)        | 310 (60.3)     |          |                  |
| Grade of study                |                   |                |          |                  |
| Eight                         | 93 (36.5)         | 162 (63.5)     | 1.95     | 0.37             |
| Nine                          | 106 (41.6)        | 149 (58.4)     |          |                  |
| Ten                           | 108 (41.9)        | 150 (58.1)     |          |                  |
| Age (in years)                |                   |                |          |                  |
| ≤ 14                          | 139 (38.1)        | 226 (61.9)     | 1.03     | 0.30             |
| > 14                          | 168 (41.7)        | 235 (58.3)     |          |                  |
| Sex of the participant        |                   |                |          |                  |
| Male                          | 184 (46.6)        | 211 (53.4)     | 14.80    | <b>&lt;0.01*</b> |
| Female                        | 123 (33.0)        | 250 (67.0)     |          |                  |
| Ethnicity                     |                   |                |          |                  |
| Brahmin/Chhetri               | 143 (41.9)        | 198 (58.1)     | 1.12     | 0.56             |
| Janajati                      | 149 (38.7)        | 236 (61.3)     |          |                  |
| Others                        | 15 (35.7)         | 27 (64.3)      |          |                  |
| Religion                      |                   |                |          |                  |
| Hindu                         | 237 (40.7)        | 345 (59.3)     | 0.56     | 0.45             |
| Others                        | 70 (37.6)         | 116 (62.4)     |          |                  |
| Monthly income of family      |                   |                |          |                  |
| <15,000 NPR                   | 33 (44.6)         | 41 (55.4)      | 1.67     | 0.79             |
| 15,001-30,000 NPR             | 102 (39.4)        | 157 (60.6)     |          |                  |
| 30,001-45,000 NPR             | 67 (40.1)         | 100 (59.9)     |          |                  |
| 45,001-60,000 NPR             | 53 (36.6)         | 92 (63.4)      |          |                  |
| >60,001 NPR                   | 52 (42.3)         | 71 (57.7)      |          |                  |
| Living status of participants |                   |                |          |                  |
| With parents                  | 278 (39.7)        | 422 (60.3)     | 0.22     | 0.63             |
| Others                        | 29 (42.6)         | 39 (57.4)      |          |                  |
| <b>Parental demographics</b>  |                   |                |          |                  |
| Educational status of mother  |                   |                |          |                  |
| Illiterate                    | 45 (36.6)         | 78 (63.4)      | 11.27    | <b>0.02*</b>     |
| Literate                      | 38 (34.2)         | 73 (65.8)      |          |                  |
| Primary level                 | 80 (42.6)         | 108 (57.4)     |          |                  |
| Secondary level               | 121 (45.8)        | 143 (54.2)     |          |                  |

|                              |                     |            |            |      |      |
|------------------------------|---------------------|------------|------------|------|------|
| Mother's occupation          | Bachelors and above | 23 (28.0)  | 59 (72.0)  |      |      |
|                              | Job service         | 43 (33.9)  | 84 (66.1)  |      |      |
|                              | Business/Shop       | 57 (40.7)  | 83 (59.3)  | 3.51 | 0.31 |
|                              | Homemaker           | 130 (39.6) | 198 (60.4) |      |      |
|                              | Others              | 77 (44.5)  | 96 (55.5)  |      |      |
| Educational status of father | Illiterate          | 23 (36.5)  | 40 (63.5)  |      |      |
|                              | Literate            | 30 (35.7)  | 54 (64.3)  |      |      |
|                              | Primary level       | 67 (39.6)  | 102 (60.4) | 1.40 | 0.84 |
|                              | Secondary level     | 129 (41.0) | 186 (59.0) |      |      |
|                              | Bachelors and above | 58 (42.3)  | 79 (57.7)  |      |      |
| Father's occupation          | Job service         | 90 (35.6)  | 163 (64.4) |      |      |
|                              | Business/Shop       | 90 (41.3)  | 128 (58.7) | 3.23 | 0.35 |
|                              | Foreign employment  | 54 (41.9)  | 75 (58.1)  |      |      |
|                              | Others              | 307 (40.0) | 95 (56.5)  |      |      |

\*p value <0.05

**Table G:** Bivariate analysis of practice and socio-demographic variables

| Demographic Characteristics | Consumption status |              | $\chi^2$   | p-value |                  |
|-----------------------------|--------------------|--------------|------------|---------|------------------|
|                             | No<br>n (%)        | Yes<br>n (%) |            |         |                  |
| Type of school              |                    |              |            |         |                  |
|                             | Public             | 49 (19.3)    | 205 (80.7) | 4.17    | <b>0.04*</b>     |
|                             | Private            | 70 (13.6)    | 444 (86.4) |         |                  |
| Grade of study              |                    |              |            |         |                  |
|                             | Eight              | 43 (16.9)    | 212 (83.1) | 6.23    | <b>0.04*</b>     |
|                             | Nine               | 28 (11.0)    | 227 (89.0) |         |                  |
|                             | Ten                | 48 (18.6)    | 210 (81.4) |         |                  |
| Age (in years)              |                    |              |            |         |                  |
|                             | ≤ 14               | 47 (12.9)    | 318 (87.1) | 3.64    | 0.05             |
|                             | > 14               | 72 (17.9)    | 331 (82.1) |         |                  |
| Sex of the participant      |                    |              |            |         |                  |
|                             | Male               | 82 (20.8)    | 313 (79.2) | 17.21   | <b>&lt;0.01*</b> |
|                             | Female             | 37 (9.9)     | 336 (90.1) |         |                  |
| Ethnicity                   |                    |              |            |         |                  |
|                             | Brahmin/Chhetri    | 56 (16.4)    | 285 (83.6) | 0.41    | 0.81             |
|                             | Janajati           | 57 (14.8)    | 328 (85.2) |         |                  |
|                             | Others             | 6 (14.3)     | 36 (85.7)  |         |                  |
| Religion                    |                    |              |            |         |                  |
|                             | Hindu              | 93 (16.0)    | 489 (84.0) | 0.43    | 0.51             |
|                             | Others             | 26 (14.0)    | 160 (86.0) |         |                  |
| Monthly income of family    |                    |              |            |         |                  |
|                             | <15,000 NPR        | 12 (16.2)    | 62 (83.8)  |         |                  |
|                             | 15,001-30,000 NPR  | 46 (17.8)    | 213 (82.2) | 3.01    | 0.55             |
|                             | 30,001-45,000 NPR  | 27 (16.2)    | 140 (83.8) |         |                  |
|                             | 45,001-60,000 NPR  | 20 (13.8)    | 125 (86.2) |         |                  |

|                               |            |            |      |              |
|-------------------------------|------------|------------|------|--------------|
| >60,001 NPR                   | 14 (11.4)  | 109 (88.6) |      |              |
| Living status of participants |            |            |      |              |
| With parents                  | 110 (15.7) | 590 (84.3) | 0.29 | 0.58         |
| Others                        | 9 (13.2)   | 59 (86.8)  |      |              |
| <b>Parental demographics</b>  |            |            |      |              |
| Educational status of mother  |            |            |      |              |
| Illiterate                    | 23 (18.7)  | 100 (81.3) |      |              |
| Literate                      | 17 (15.3)  | 94 (84.7)  | 6.61 | 0.15         |
| Primary level                 | 36 (19.1)  | 152 (80.9) |      |              |
| Secondary level               | 36 (13.6)  | 228 (86.4) |      |              |
| Bachelors and above           | 7 (8.5)    | 75 (91.5)  |      |              |
| Mother's occupation           |            |            |      |              |
| Job service                   | 26 (20.5)  | 101 (79.5) |      |              |
| Business/Shop                 | 23 (16.4)  | 117 (83.6) | 9.89 | <b>0.01*</b> |
| Homemaker                     | 36 (11.0)  | 292 (89.0) |      |              |
| Others                        | 34 (19.7)  | 139 (80.3) |      |              |
| Educational status of father  |            |            |      |              |
| Illiterate                    | 13 (20.6)  | 50 (79.4)  |      |              |
| Literate                      | 14 (16.7)  | 70 (83.3)  | 6.74 | 0.15         |
| Primary level                 | 32 (18.9)  | 137 (81.1) |      |              |
| Secondary level               | 47 (14.9)  | 268 (85.1) |      |              |
| Bachelors and above           | 13 (9.5)   | 124 (90.5) |      |              |
| Father's occupation           |            |            |      |              |
| Job service                   | 45 (17.8)  | 208 (82.2) |      |              |
| Business/Shop                 | 34 (15.6)  | 184 (84.4) | 3.95 | 0.26         |
| Foreign employment            | 13 (10.1)  | 116 (89.9) |      |              |
| Others                        | 27 (16.1)  | 141 (83.9) |      |              |

**\*p value <0.05**

**Table H.** Body Mass Index (BMI) of the respondents

| <b>Categories: Range of BMI</b> | <b>Frequency</b> | <b>Percentage</b> |
|---------------------------------|------------------|-------------------|
| Underweight                     | 332              | 43.2              |
| Normal                          | 387              | 50.4              |
| Overweight and Obese            | 49               | 6.4               |

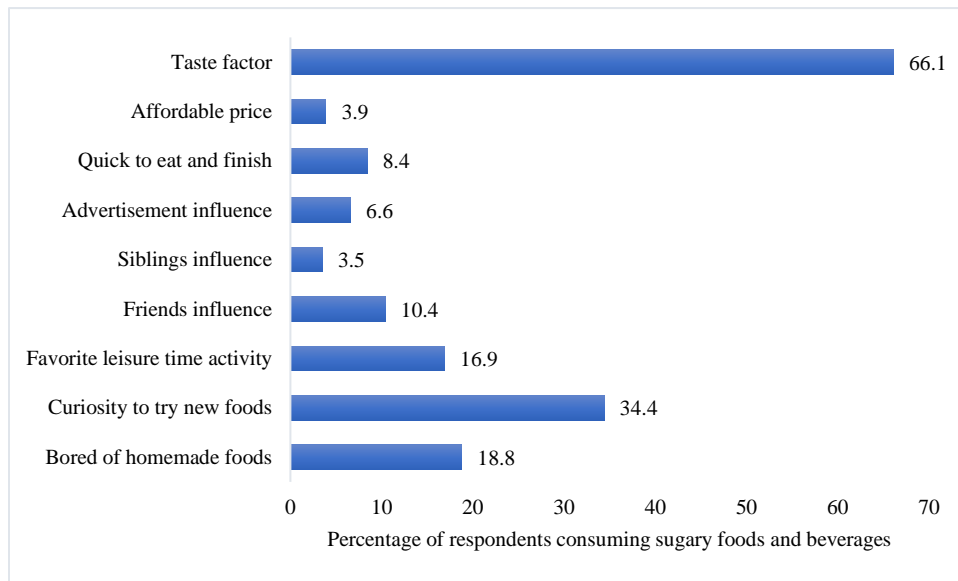

**Figure A.** Reasons for consumption of sugary foods and beverages among respondents
